# Supplementary material for: A role of multi-modal rhythms in physical interaction and cooperation
Source: Springer Nature journal article supplement (doi:10.1186/1687-4722-2012-12), 2012-03-02
Supplement: 13636_2011_47_MOESM2_ESM.pdf [file 13636_2011_47_MOESM2_ESM.pdf]

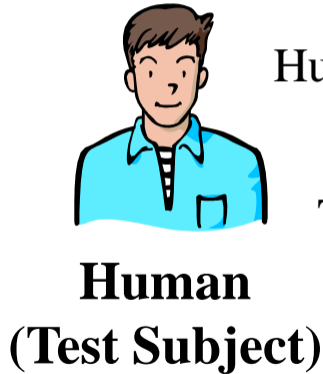

←  Human does not feel any force

→  
Turning

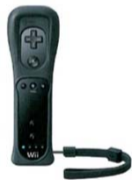

**Wii Remote**

→  
Direction

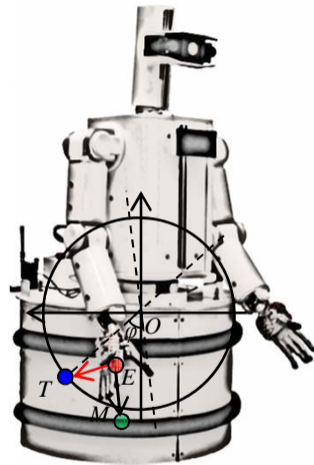

**Robot**

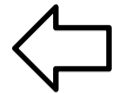

Force  
data

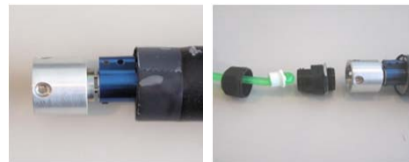

**Force Sensors**

↑  
Force

→  
Turning

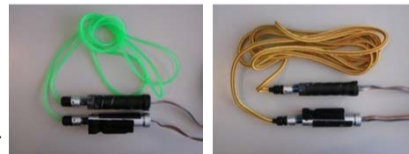

**Ropes**
